# Supplementary material
Source: HighWire-hosted journal article supplement (http://erj.ersjournals.com/highwire/filestream/113356/field_highwire_adjunct_files/0/Methods-online-Sleep-NM-ERJ.pdf)
Supplement: Methods-online-Sleep-NM-ERJ.pdf [file Methods-online-Sleep-NM-ERJ.pdf]

## **Nocturnal hypoxemia and hypercapnia in children with neuromuscular disorders**

Chiara Bersanini, MD, Sonia Khirani, PhD, Adriana Ramirez, MSc, Frédéric Lofaso, MD,  
PhD, Guillaume Aubertin, MD, Nicole Beydon, MD, Michèle Mayer, MD,  
Kim Maincent, MD, Michèle Boulé, MD, PhD, and Brigitte Fauroux, MD, PhD

On line repository

## Material and methods

### *Lung function and respiratory muscle tests*

The study was performed at the end of the morning or in the beginning of the afternoon and started with the determination of breathing pattern. The patient remained in the sitting position and breathed room air for almost 2 minutes to achieve a steady state for end tidal carbon dioxide. Breathing pattern was determined from flow tracing, measured by a pneumotachograph (Fleisch # 3, Lausanne, Switzerland) which was attached to a mouthpiece. Tidal volume ( $V_T$ ) was expressed in ml/kg and minute ventilation ( $V_E$ ) in L/min and the ratio of breathing rate to  $V_T$  ( $f_R/V_T$ ) was calculated.

After a period of rest, capillary arterial blood gases with pH were first determined [1]. Then functional residual capacity was measured by the helium dilution technique (FRCH<sub>e</sub>). Thereafter, the patient was asked to perform at least 3 physician-accepted forced vital capacity (FVC) curves and the curve with the highest FVC was used for the analysis [2, 3]. Maximal static inspiratory ( $P_{imax}$ ) and expiratory ( $P_{emax}$ ) pressures were measured from FRC and total lung capacity, respectively. Patients were asked to perform at least 3 measurements until two reproducible maximal values were obtained. The best value was retained for analysis and the mean value that could be maintained for one second was calculated [4].

In order to determine the strength of the inspiratory muscles, the patient was asked to perform at least 10 to 20 short, sharp maximal sniffs and the maximum sniff nasal inspiratory pressure (SNIP) was recorded [5].

Afterwards, an oesogastric catheter was inserted pernasally after careful local anesthesia (lidocaine 2%, Astra Zeneca, Rueil-Malmaison, France). This 2.1 mm external diameter catheter mounted pressure transducer system has two integral transducers mounted 5

(for the gastric pressure,  $P_{gas}$ ) and 35 cm (for the oesophageal pressure,  $P_{es}$ ) from the distal tip (Gaeltec, Dunvegan, Isle of Skye, UK). This catheter was advanced gently until the distal tip was in the stomach and the proximal pressure transducer in the middle portion of the oesophagus. Appropriate placement of the  $P_{es}$  transducer was assessed with the usual method [6].  $P_{di}$  was obtained by subtracting on line the  $P_{es}$  signal from the  $P_{gas}$  signal.

During quiet breathing, paradoxal breathing was assessed by calculating the ratio of the  $P_{gas}$  swing to the  $P_{di}$  swing ( $\Delta P_{gas}/\Delta P_{di}$ ), which is an index that reflects the relative contribution of the diaphragm to tidal breathing [7]. A negative  $\Delta P_{gas}/\Delta P_{di}$  signifies paradoxical movement of the diaphragm.

The patient's inspiratory effort during quiet breathing was assessed by measuring  $P_{es}$  and  $P_{di}$  swings, and the oesophageal (PT $P_{es}$ ) and diaphragmatic (PT $P_{di}$ ) pressure-time products. The PT $P_{es}$  product by breath (PT $P_{es}$ /breath) was obtained by measuring the area under  $P_{es}$  signal between the onset of inspiratory effort and the end of inspiration, and was referred to the chest wall static recoil pressure-time relationship according to a methodology adapted from Sassoon and colleagues [8]. The PT $P_{di}$ /breath was obtained by measuring the area under the  $P_{di}$  signal from the onset of its positive deflection to the end of inspiratory flow. Both PT $P_{es}$  and PT $P_{di}$  were also expressed per minute (PT $P_{es}$ /min and PT $P_{di}$ /min) by multiplying the pressure-time products per breaths by the breathing frequency, values in healthy adults being around 100 cmH<sub>2</sub>O.s.min<sup>-1</sup> [9].

Finally, dynamic lung compliance ( $C_{Ldyn}$ ) was measured during quiet breathing as previously described [10]. Inspiratory airway-lung resistance ( $R_{Linsp}$ ) was calculated according to the formula based on the technique of Mead and Whittenberger [11]:  $R_{Linsp} = [(P_{es0} - P_{es} - (V/C_{Ldyn}))/V]$  where  $P_{es0}$  is the  $P_{es}$  value at the start of inspiratory flow,  $V$  is the instantaneous volume of breath integrated from airflow,  $C_{Ldyn}$  is the dynamic lung

compliance calculated for the same breath, and  $V'$  is the instantaneous airflow. Mean values over the inspiration were used as estimates of  $R_{Linsp}$ .

The strength of the inspiratory muscles was measured again by asking the patient to perform the sniff maneuver but this time, maximal Sniff Pes and Sniff Pdi were measured. The strength of the expiratory muscles was measured by asking the patient to perform a maximal cough. The peak Pgas value of at least 5 maximal coughs was measured (Pgas cough) [12].

The diaphragmatic tension time index (TTdi), which estimates the endurance of the diaphragm, was calculated during quiet breathing as  $TTdi = (Pdi/Sniff\ Pdi) \times Ti/Ttot$ , where Pdi is the mean Pdi during spontaneous breathing, Sniff Pdi the maximal Pdi during a sniff, and Ttot total breath time [13]. The oesophageal tension time index (TTes), which estimates the overall endurance of the inspiratory muscles, was calculated as  $TTes = (Pes/Sniff\ Pes) \times Ti/Ttot$  where Pes is the mean Pes during spontaneous breathing and Sniff Pes the maximal Pes during a sniff [13].

#### *Overnight pulse oximetry and transcutaneous carbon dioxide recording*

An overnight pulse oximetry ( $SpO_2$ ) and transcutaneous carbon dioxide ( $PtcCO_2$ ) recording was performed in room air by the combined SenTec Digital Monitor using the V-Sign<sup>TM</sup> Sensor (SenTec AG, Therwil, Switzerland) which has been validated in our laboratory [14]. The following data were extracted from the SenTec Digital Monitor: mean and minimal  $SpO_2$ , number of desaturations  $\geq 4\%$ /hour of recording, percentage of total nighttime spent with a  $SpO_2 < 90\%$ , mean and maximum  $PtcCO_2$ , and percentage of total nighttime spent with  $PtcCO_2 > 50$  mmHg. Nocturnal hypoxemia was defined by a minimal  $SpO_2 < 90\%$  for at least 2% of sleep time [15] and nocturnal hypercapnia was defined by a maximal  $PtcCO_2$  value  $> 50$  mmHg for at least 2% of sleep time [16].

### *Polysomnography*

Polysomnography (PSG) was performed in room air [17]. Obstructive apnea was defined as a drop in thermal sensor amplitude by  $\geq 90\%$  of baseline for at least 2 respiratory cycles, with continued or increased inspiratory effort during reduced airflow. Central apnea was defined as a drop in thermal sensor amplitude by  $\geq 90\%$  of baseline in absence of inspiratory effort, either with a duration  $\geq 20$  sec or at least 2 missed breaths and associated with arousal, awakening or  $\geq 3\%$  desaturation. Mixed apnea was defined as a drop in thermal sensor amplitude by  $\geq 90\%$  of baseline for at least 2 respiratory cycles with the absent inspiratory effort initially, then resumption of effort during latter part of event. Hypopnea was defined as a drop in nasal air pressure transducer amplitude by  $\geq 50\%$  for a duration  $\geq 2$  missed breaths, associated with arousal, awakening or  $\geq 3\%$  desaturation [18, 19]. Apnea-hypopnea index (AHI) was calculated as the sum of apnea and hypopnea events per hour of total sleep.

### References

- 1 Gaultier C, Boulé M, Allaire Y, *et al.* Determination of capillary oxygen tension in infants and children: assessment of methodology and normal values during growth. *Bull Europ Physiopath Resp* 1978; 14: 287-294.
- 2 Quanjer PH. Standardized lung function testing. *Eur Resp J* 1993; 6 (Suppl. 16): 5-30s.
- 3 Knudson RJ, Lebowitz MD, Holberg CJ, *et al.* Changes in the normal maximal expiratory flow-volume curve with growth and aging. *Am Rev Respir Dis* 1983; 127: 725-734.
- 4 Gaultier C, Zinman R. Maximal static pressures in healthy children. *Respir Physiol Neurobiol* 1983; 51: 45-61.

- 5 Fauroux B, Aubertin G, Cohen E, *et al.* Sniff nasal inspiratory pressure in children with muscular, chest wall or lung disease. *Eur Respir J* 2009; 33: 113-117.
- 6 Baydur A, Behrakis PK, Zin WA, *et al.* A simple method for assessing the validity of the esophageal balloon technique. *Am Rev Respir Dis* 1982; 126: 788-791.
- 7 Gilbert R, Auchincloss JHJ, Peppi D. Relationship of rib cage and abdomen motion to diaphragm function during quiet breathing. *Chest* 1981; 80: 607-612.
- 8 Sassoon CSH, Light RW, Lodia R, *et al.* Pressure-time product during continuous positive airway pressure, pressure support ventilation and T-piece during weaning from mechanical ventilation. *Am Rev Resp Dis* 1991; 143: 459-475.
- 9 Field S, Grassino A, Sanci S. Respiratory muscle oxygen consumption estimated by the diaphragm pressure-time index. *J Appl Physiol* 1984; 57: 44-51.
- 10 Hart N, Polkey MI, Clément A, *et al.* Changes in pulmonary mechanics with increasing disease severity in children and young adults with cystic fibrosis. *Am J Respir Crit Care Med* 2002; 166: 61-66.
- 11 Mead J, Whittenberger JL. Physical properties of human lungs measured during spontaneous respiration *J Appl Physiol* 1953; 5: 779-796.
- 12 Man WDC, Kyroussis D, Fleming TA, *et al.* Cough gastric pressure and maximum expiratory mouth pressure in humans. *Am J Respir Crit Care Med* 2003; 168: 714-717.
- 13 Bellemare F, Grassino A. Effect of pressure and timing of contraction on human diaphragm fatigue. *J Appl Physiol* 1982; 53: 1190-1195.
- 14 Paiva R, Krivec U, Aubertin G, *et al.* Carbon dioxide monitoring during long-term noninvasive respiratory support in children. *Intensive Care Med* 2009; 35: 1068-1074.
- 15 Hukins CA, Hillman DR. Daytime predictors of sleep hypoventilation in Duchenne muscular dystrophy. *Am J Respir Crit Care Med* 2000; 161: 166-170.

- 16 Ward S, Chatwin M, Heather S, *et al.* Randomised controlled trial of non-invasive ventilation (NIV) for nocturnal hypoventilation in neuromuscular and chest wall disease patients with daytime normocapnia. *Thorax* 2005; 60: 1019-1024.
- 17 Society AT. Standards and indications for cardiopulmonary sleep studies in children. *Am J Respir Crit Care Med* 1996; 153: 866-878.
- 18 Iber C, Ancoli-Israel S, Chesson AL, *et al.* The AASM manual for the scoring of sleep and associated events. *American Academy of Sleep Medicine* 2007; Westchester, IL.
- 19 Accardo JA, Shults J, Leonard MB, *et al.* Differences in overnight polysomnography scores using the adult and pediatric criteria for respiratory events in adolescents. *Sleep* 2010; 33: 1333-1339.
